# Supplementary material
Source: PubMed Central journal article supplement (PMC6777241)
Supplement: jamaoncol-6-125-s002.pdf [file jamaoncol-6-125-s002.pdf]

## Supplementary Online Content

Jameson GS, Borazanci E, Babiker HM, et al. Response rate following albumin-bound paclitaxel plus gemcitabine plus cisplatin treatment among patients with advanced pancreatic cancer: a phase 1b/2 pilot clinical trial. *JAMA Oncol*. Published online October 3, 2019. doi:10.1001/jamaoncol.2019.3394

**eAppendix 1.** Methods

**eTable 1.** Patient Detail

**eTable 2.** Grade 3-5 Treatment-Related Adverse Events

**eTable 3.** Germline Testing Results and Overall Survival

**eFigure.** Representative Patient Responses

**eAppendix 2.** Results

**eReferences.**

This supplementary material has been provided by the authors to give readers additional information about their work.

## **eAppendix 1. Methods**

### **Genomic Analysis**

Enrolled patients were invited to participate in an optional biomarker sub-study for comparative genomic hybridization (CGH) and next generation sequencing (NGS). This participation required a separate written informed consent for the collection and use of tissue samples from previous diagnostic biopsy or surgery.

DNA content flow cytometry of the tissue samples was performed as follows:

For FFPE samples excess paraffin was removed with a scalpel from either side of 40-60  $\mu\text{m}$  scrolls then processed for removal of protein crosslinks and recovery of nuclei, while frozen tissue biopsies were minced in the presence of NST buffer and DAPI according to our published protocols.<sup>1-3</sup> Nuclei from each sample were disaggregated then filtered through a 40  $\mu\text{m}$  mesh prior to flow sorting with an Influx cytometer (Becton-Dickinson, San Jose, CA) with ultraviolet excitation and DAPI emission collected at  $>450$  nm. DNA content and cell cycle were analyzed using the software program MultiCycle (Phoenix Flow Systems, San Diego, CA). Tissue from patient 10140202 had a small ( $<10\%$  of tissue content) aneuploid (3.2N) peak in the presence of much larger diploid peak, while the remaining two samples had only diploid (2N  $G_0/G_1$ ) and corresponding tetraploid (4N  $G_2/M$ ) peaks in their flow cytometry profiles. The frozen biopsy from patient 10140206 also had a small aneuploid (3.8N) peak in the presence of a much larger diploid fraction in the flow sorting profile. DNA was extracted from the nuclei of each sorted peak then processed for genomic analyses. For FFPE samples we used the Agilent SureSelect<sup>XT</sup> HS kit (Agilent Technologies Santa Clara CA) to make libraries from the sorted diploid and aneuploid fractions. Libraries for fresh frozen samples were prepared directly from aliquots of DNA that were also used for CNV analysis using Agilent 400k oligonucleotide CGH arrays. In all cases whole exome sequencing was done using Agilent\_V6\_PlusUTR\_hs37d5\_Baits through the Mayo Clinic Medical Genome Facility (MGF) according to established protocols.

### **Germline Testing**

Germline testing was not required of all patients but was done as part of routine medical care and results were collected as part of this study. Germline testing was performed through Ambry Genetics (Aliso Viejo, CA), GenDX (Genome Diagnostics B.V., Netherlands), Myriad Genetics (Salt Lake City, UT), or Invitae (San Francisco, CA). All germline testing was done through CLIA certified clinical diagnostic laboratories.

| eTable 1. Patient Detail |     |     |                        |                 |                          |                        |                               |            |                  |               |                         |                                                                                                     |
|--------------------------|-----|-----|------------------------|-----------------|--------------------------|------------------------|-------------------------------|------------|------------------|---------------|-------------------------|-----------------------------------------------------------------------------------------------------|
| Subject ID               | Sex | Age | Primary Tumor Location | Prior Surgery   | Mets                     | Prior Adjuvant Therapy | Germline Mutation or VUS      | Dose       | Total No. Cycles | Best Response | OS (days) As of 12/5/18 | Reason for DC                                                                                       |
| 10140201                 | F   | 60  | Head                   | Aborted Whipple | Liver                    | No                     | Negative                      | 25         | 12               | CR            | 1815+                   | Maximum benefit achieved                                                                            |
| 10140202                 | F   | 65  | Tail                   | Aborted Whipple | Liver , omental          | No                     | Not Done                      | 25         | 8                | PR            | 374                     | Toxicity                                                                                            |
| 10140203                 | F   | 62  | Head                   | Whipple         | Lung, liver              | Yes Gem/5FU,RT         | Not Done                      | 25         | 7                | PR            | 498                     | Pt choice to discontinue treatment                                                                  |
| 10140204                 | M   | 62  | Tail                   | No              | Omentum, small intestine | No                     | Negative                      | 50         | 7                | PR            | 310                     | Clinical progression                                                                                |
| 10140205                 | F   | 47  | Body                   | No              | Lung (bilateral), bone   | No                     | VUS- RAD51C                   | 25         | 9                | PR            | 1102                    | Maximum benefit achieved                                                                            |
| 10140206                 | M   | 57  | Head                   | Aborted Whipple | Liver                    | No                     | VUS- MUTYH, ATM likely benign | 25         | 8                | CR            | 1312                    | Maximum benefit achieved                                                                            |
| 10140209                 | M   | 75  | Head                   | Whipple         | Mesenteric, peritoneal   | Yes FOLFIRNO, RT       | Not Done                      | 37.5<br>25 | 2                | PD            | 104                     | Clinical progression                                                                                |
| 10140210                 | M   | 73  | Tail                   | No              | Liver                    | No                     | Not Done                      | 37.5       | 3                | PD            | 450                     | Confirmed disease progression                                                                       |
| 10140211                 | F   | 66  | Body                   | No              | Liver                    | No                     | Negative                      | 37.5       | 12               | PR            | 733                     | Maximum benefit achieved                                                                            |
| 10140212                 | F   | 68  | Body                   | Aborted Whipple | Liver                    | No                     | BRCA2                         | 25         | 14               | PR            | 1378+                   | Maximum benefit achieved                                                                            |
| 10140213                 | F   | 61  | Tail                   | No              | Liver                    | No                     | MUTYH                         | 25         | 9                | SD            | 479                     | Maximum benefit achieved                                                                            |
| 10140214                 | F   | 56  | Body                   | No              | Liver                    | No                     | BRCA2                         | 25         | 4.5              | PR            | 907                     | Toxicity                                                                                            |
| 10140215                 | M   | 75  | Body                   | No              | Liver                    | No                     | Not Done                      | 25         | 9                | PR            | 510                     | Maximum benefit achieved                                                                            |
| 10140216                 | M   | 68  | Head                   | No              | Liver                    | No                     | Negative                      | 25         | 2                | PD            | 235                     | Confirmed disease progression                                                                       |
| 10140217                 | F   | 66  | Head                   | Whipple         | Lung (bilateral)         | Yes Gem/Abraxane       | Not Done                      | 25         | 5                | SD            | 732                     | Adverse event-stroke                                                                                |
| 10140218                 | M   | 68  | Body                   | No              | Liver                    | Yes Gem/Abraxane       | BRCA2; VUS-POLD1, MSH6        | 25         | 8                | PR            | 1099+                   | Maximum benefit achieved                                                                            |
| 10140219                 | M   | 60  | Tail                   | No              | Mesenteric               | No                     | Negative                      | 25         | 14               | PR            | 771                     | Maximum benefit achieved                                                                            |
| 10140220                 | F   | 54  | Tail                   | No              | Liver, lungs             | No                     | Negative                      | 25         | 10.5             | PR            | 501                     | Confirmed disease progression                                                                       |
| 10140221                 | M   | 71  | Body                   | No              | Liver                    | No                     |                               | 25         | 8                | PR            | 305                     | Confirmed disease progression                                                                       |
| 10140223                 | F   | 79  | Head                   | Whipple         | Lung                     | Yes Gem/Abraxane       | VUS- ATM                      | 25         | 7.5              | SD            | 211                     | Clinical progression                                                                                |
| 10140224                 | M   | 53  | Body                   | No              | Liver                    | No                     | Not Done                      | 25         | 8                | PR            | 351                     | Confirmed disease progression                                                                       |
| 10140225                 | M   | 62  | Head                   | No              | Liver                    | No                     | VUS- POLE                     | 25         | 4                | SD            | 96                      | Grade 5 SAE: CVA                                                                                    |
| 10140226                 | M   | 75  | Head                   | No              | Liver                    | No                     | Not Done                      | 25         | 1                | NA            | 31                      | Grade 5 SAE: cryptosporidium infection (Pt chose to discontinue treatment for infection and cancer) |
| 10340202                 | M   | 63  | Body                   | No              | Liver                    | No                     | Not Done                      | 25         | 7                | PR            | 154                     | Grade 5 SAE: unwitnessed cardiac arrest                                                             |
| 10390201                 | M   | 56  | Head                   | Whipple         | Liver                    | Chemo/RT               | Not Done                      | 25         | 11               | PR            | 747                     | Adverse event-sepsis C1, D4 unrelated                                                               |

**eTable 2. Grade 3-5 Treatment-related adverse events**

| <b>Grade 3-5 Treatment-related adverse events (worse grade ever by patient)</b> | <b>Grade 3</b>        |        | <b>Grade 4</b>        |        | <b>Grade 5</b>        |       |
|---------------------------------------------------------------------------------|-----------------------|--------|-----------------------|--------|-----------------------|-------|
| <b>System Organ Class/Preferred Term</b>                                        | <b>N=25<br/>n (%)</b> |        | <b>N=25<br/>n (%)</b> |        | <b>N=25<br/>n (%)</b> |       |
| Total Patients with AEs by Maximum Grade                                        | 12 (48.0)             |        | 9 (36.0)              |        | 2 (8.0)               |       |
| Platelet count decreased                                                        | 8                     | (32.0) | 9                     | (36.0) | 0                     |       |
| Neutrophil count decreased                                                      | 5                     | (20.0) | 1                     | (4.0)  | 0                     |       |
| White blood cell decreased                                                      | 1                     | (4.0)  | 1                     | (4.0)  | 0                     |       |
| Lymphocyte count decreased                                                      | 1                     | (4.0)  | 0                     |        | 0                     |       |
| Lymphocyte count increased                                                      | 1                     | (4.0)  | 0                     |        | 0                     |       |
| Anemia                                                                          | 8                     | (32.0) | 0                     |        | 0                     |       |
| Febrile neutropenia                                                             | 0                     |        | 1                     | (4.0)  | 0                     |       |
| Diarrhea                                                                        | 2                     | (8.0)  | 0                     |        | 0                     |       |
| Nausea                                                                          | 1                     | (4.0)  | 0                     |        | 0                     |       |
| Vomiting                                                                        | 1                     | (4.0)  | 0                     |        | 0                     |       |
| Fatigue                                                                         | 1                     | (4.0)  | 0                     |        | 0                     |       |
| Fever                                                                           | 1                     | (4.0)  | 0                     |        | 0                     |       |
| Dehydration                                                                     | 2                     | (8.0)  | 0                     |        | 0                     |       |
| Hypokalemia                                                                     | 1                     | (4.0)  | 0                     |        | 0                     |       |
| Anorectal infection                                                             | 1                     | (4.0)  | 0                     |        | 0                     |       |
| Acute cryptosporidiosis                                                         | 0                     |        | 0                     |        | 1                     | (4.0) |
| Stroke                                                                          | 0                     |        | 0                     |        | 1                     | (4.0) |
| Peripheral motor neuropathy                                                     | 1                     | (4.0)  | 0                     |        | 0                     |       |
| Epistaxis                                                                       | 1                     | (4.0)  | 0                     |        | 0                     |       |

Note: Percentages are based on the total number of patients in the analysis population.

Note: A patient who experienced multiple events within a system organ class (SOC) or preferred term was counted once for that class and once for the preferred term at the maximum observed grade.

**eTable 3. Germline testing results and overall survival**

| Pt # | Sex | Age at time of consent | Germ Line Mutation or Variance of Unknown Significance (VUS) | OS mos as of 12/05/18 |
|------|-----|------------------------|--------------------------------------------------------------|-----------------------|
| 201  | F   | 60                     | Negative                                                     | 59.7+                 |
| 204  | M   | 62                     | Negative                                                     | 10.2                  |
| 205  | F   | 47                     | VUS-RAD51C                                                   | 36.2                  |
| 206  | M   | 57                     | VUS-MUTYH, ATM likely benign                                 | 43.1                  |
| 211  | F   | 66                     | Negative                                                     | 24.1                  |
| 212  | F   | 68                     | BRCA2                                                        | 45.3+                 |
| 213  | F   | 61                     | MUTYH                                                        | 15.7                  |
| 214  | F   | 56                     | BRCA2                                                        | 29.8                  |
| 216  | M   | 68                     | Negative                                                     | 7.7                   |
| 218  | M   | 68                     | BRCA2; VUS-POLD1, MSH6                                       | 36.1+                 |
| 219  | M   | 60                     | Negative                                                     | 25.3                  |
| 220  | F   | 54                     | Negative                                                     | 16.5                  |
| 223  | F   | 79                     | VUS- ATM                                                     | 6.9                   |
| 225  | M   | 62                     | VUS- POLE                                                    | 3.2                   |

**eFigure. Representative Patient Responses. (A) Patient 10140201 Images- Resolved Pancreas Mass and Liver Metastasis, (B) Patient 10140202 Images- Resolved Peripancreatic Mass**

**A. Patient 10140201- Resolved Pancreas Mass and Liver Metastasis**

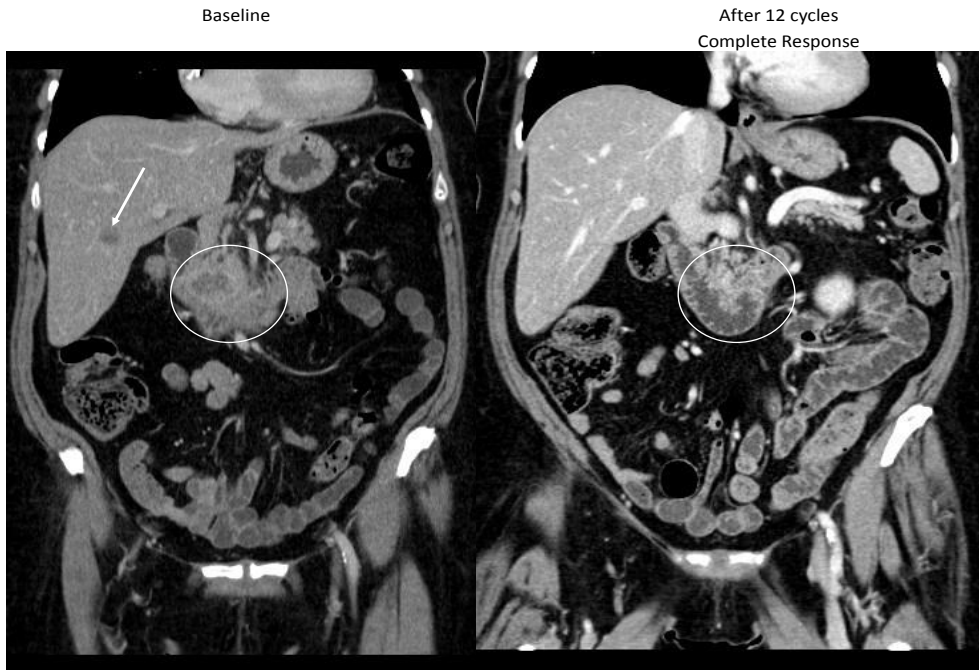

**B. Patient 10140202- Resolved Peripancreatic Mass**

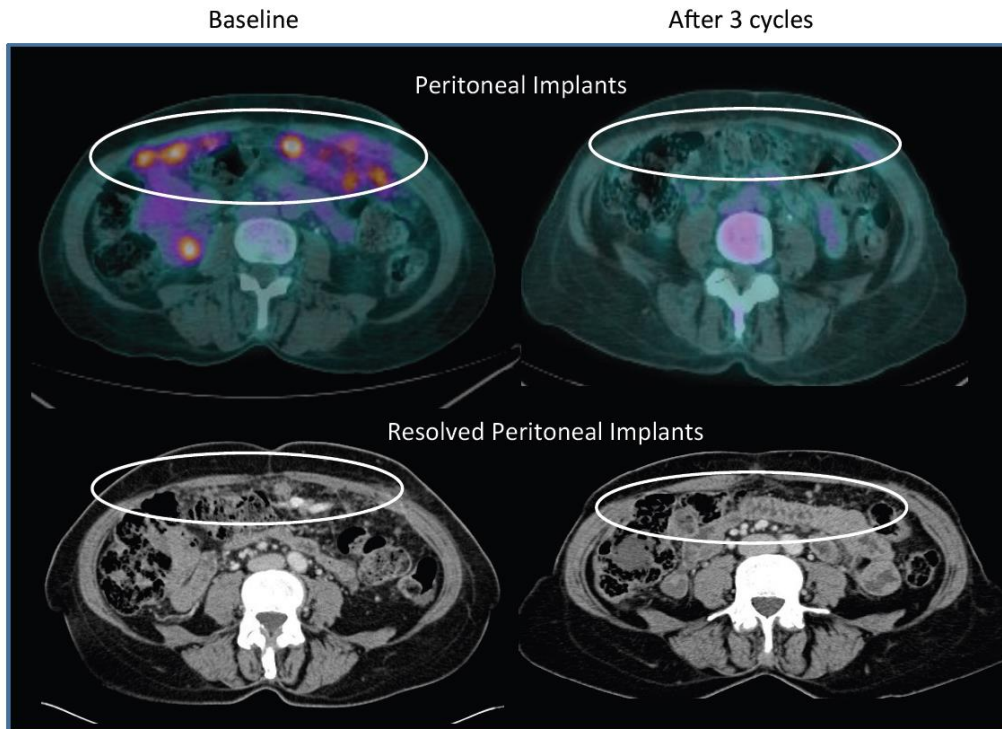

## eAppendix 2. Results

### Genomic Analysis

We obtained diagnostic formalin-fixed paraffin-embedded (FFPE) tissue samples for 13 patients. Intact tissue was not detected in 4/13 FFPE samples, and only 3/9 of the remaining samples had sufficient yield of nuclei (>20,000) after sorting of tumor cells from normal cells for analysis. Unfortunately, only one (patient 202) had tumor present based on the detection of somatic mutations in exome sequencing performed on that specimen. We also obtained a post study treatment frozen tumor tissue sample on patient 206 who underwent a Whipple procedure, of a lesion that appeared on the pancreas after 18 months of response to chemotherapy. The results of these genomic analyses are summarized below for each of these two patients.

Genomic analysis of the baseline specimen for patient 202: In addition to pathogenic mutations in *KRAS*<sup>G12R</sup>, *TP53*<sup>Q144K</sup>, and *EGFR*<sup>S645C</sup>, and a homozygous deletion of *CDKN2A*, patient 202 had a somatic homozygous *BRCA2*<sup>F3090L</sup> variant. This variant has been described as a rare germ line variant of unknown significance (VUS) associated with familial breast and ovarian cancer.<sup>4</sup> This patient experienced resolution of peritoneal metastases within 9 weeks, eFig 1b.

Genomic analysis of post treatment specimen for patient 206: This patient experienced a durable CR after 8 cycles of chemotherapy, underwent a Whipple resection 20 months after start of treatment, and had an OS of 43.7 months. The tumor tissue obtained in the resection showed the presence of a homozygous deletion of *CDKN2A*, and somatic *KRAS*<sup>G12D</sup> and *TP53*<sup>G244D</sup> mutations confirming the tumor nature of the 3.8N population. Strikingly we also detected somatic mutations in *RNF43*<sup>R132X</sup> and *CDK13*<sup>R986C</sup> in the 3.8N genome. RNF43 is an E3 ubiquitin-protein ligase that negatively regulates WNT signaling. CDK13 is required for RNA splicing and is a key regulator of transcription elongation. Of note, there was no tumor tissue available from initial diagnostic liver biopsy from this patient for comparison.

Genomic analysis, while limited, yielded interesting insights. In patient 202, tumor genomic analysis yielded a variant of unknown significance (VUS) in the *BRCA2* gene, a gene frequently linked to both familial pancreatic cancer and to treatment response in cancers with DNA repair abnormalities.<sup>4</sup> Although classified as a VUS the somatic and homozygous nature of *BRCA2*<sup>F3090L</sup> variant in patient 202 suggests a role in the rapid initial response to addition of cisplatin given established efficacy in tumors with DNA damage repair alterations. In contrast a known nonpathogenic heterozygous single nucleotide *BRCA1*<sup>K1183R</sup> polymorphism was present at the same allele frequency in both the germ line (2.0N) and tumor (3.2N) genomes.

As mentioned in the analysis of patient 206, the patient's tumor genome had a homozygous deletion of *CDKN2A*, and *KRAS*<sup>G12D</sup> and *TP53*<sup>G244D</sup> somatic mutations. In addition to these prevalent lesions, we also detected somatic mutations in *RNF43* and *CDK13*. Mutations in *RNF43* have been reported in a subset (7%) of pancreatic cancers and in almost 20% of colorectal cancers, notably frameshift mutations in MSI+ tumors.<sup>5,6</sup> However there was no evidence for MSI in this tumor. *CDK13* is a member of the cyclin dependent kinase family most closely related by sequence to the RNA polymerase regulator *CDK12*.<sup>7</sup> Notably inactivating mutations in *CDK12* are associated with genomic instability in ovarian cancer and sensitize cells to agents that induce lesions repaired by HR, and to poly(ADP-ribose) polymerase (PARP) inhibitors.<sup>8</sup> The pathogenic *CDK13* R986C variant has been reported in chronic myelogenous leukemia.<sup>9</sup> However the exact function of *CDK13* remains to be determined. The aforementioned alterations correlated with responses, albeit low powered, and hint towards potential efficacy of this regimen not only in DNA damage repair alterations but also in other pathways such as cell cycle and Wnt pathways which can be investigated in future studies.

### Germline Testing

Germline testing was not a part of this study. However, 14 patients underwent germline testing as part of routine medical care. Of those, 8 patients had germ line mutations and/or variants detailed in eTable 3). Previous work has suggested a greater efficacy of platinum agents in individuals with germline mutations in *BRCA1/2*.<sup>3,10</sup> Three patients with germ line *BRCA* mutations survived > 30 months (patients 212, 214, and 218). In the case of the longest survivor to date, (59.7+ months) who achieved a CR there was no identifiable germline mutation or variant suggestive of DNA repair deficiency.

## eReferences

1. Holley T, Lenkiewicz E, Evers L, Tembe W, Ruiz C, Gsponer JR, et al. Deep clonal profiling of formalin fixed paraffin embedded clinical samples. *PLoS One*. 2012; **7**(11):e50586. doi: 10.1371/journal.pone.0050586
2. Rabinovitch PS, et al., Predictors of progression in Barrett's esophagus III: baseline flow cytometric variables. *Am J Gastroenterol*. 2001 Nov; **96**(11):3071–83. doi: 10.1111/j.1572-0241.2001.05261.x
3. Barrett, MT, Deiotte R, Lenkiewicz E, Malasi S, Holley T, Evers L, et al. Clinical study of genomic drivers in pancreatic ductal adenocarcinoma. *Br J Cancer*. 2017 Aug 8; **117**(4): p. 572–582.
4. Hakansson S, Johannsson O, Johannsson U, Sellberg G, Loman N, et al. Moderate frequency of BRCA1 and BRCA2 germ-line mutations in Scandinavian familial breast cancer. *Am J Hum Genet*. 1997 May; **60**(5):1068–78.
5. Giannakis M, Hodis E, Jasmine Mu X, Yamauchi M, Rosenbluh J, Cibulskis K, et al. RNF43 is frequently mutated in colorectal and endometrial cancers. *Nat Genet*. 2014 Dec; **46**(12):1264–6. doi: 10.1038/ng.3127
6. Cancer Genome Atlas Research Network. Integrated genomic characterization of pancreatic ductal adenocarcinoma. *Cancer Cell*. 2017 Aug 14; **32**(2):185–203.e13. doi: 10.1016/j.ccell.2017.07.007
7. Even Y, Escande ML, Fayet C, Genevière AM. CDK13, a kinase involved in pre-mRNA splicing, is a component of the perinucleolar compartment. *PLoS One*. 2016 Feb 17; **11**(2):e0149184. doi: 10.1371/journal.pone.0149184
8. Popova T, Manié E, Boeva V, Battistella A, Goundiam O, Smith NK, et al. Ovarian cancers harboring onactivating mutations in CDK12 display a distinct genomic instability pattern characterized by large tandem duplications. *Cancer Res*. 2016 Apr 1; **76**(7):1882–91. doi: 10.1158/0008-5472.CAN-15-2128
9. Mason CC, Khorashad JS, Tantravahi SK, Kelley TW, Zabriskie MS, Yan D, et al. Age-related mutations and chronic myelomonocytic leukemia. *Leukemia*. 2016 Apr; **30**(4):906–13. doi: 10.1038/leu.2015.337
10. Golan T, Kanji ZS, Epelbaum R, Devaud N, Dagan E, Holter S, et al. Overall survival and clinical characteristics of pancreatic cancer in BRCA mutation carriers. *Br J Cancer*. 2014 Sep; **111**(6):1132–8. doi: 10.1038/bjc.2014.418
